# Supplementary material for: An “electronegative” bifunctional coating layer: simultaneous regulation of polysulfide and Li-ion adsorption sites for long-cycling and “dendrite-free” Li–S batteries
Source: Royal Society of Chemistry journal article supplement (doi:10.1039/c9ta07999h), 2019-01-01
Supplement: c9ta07999h1.pdf [file c9ta07999h1.pdf]

## *Supporting Information*

### **An “electronegative” bifunctional coating layer: simultaneous regulation of polysulfide and Li-ion adsorption sites for long-cycling and “dendrite-free” Li–S batteries**

Qian Lu <sup>a</sup>, Xiaohong Zou <sup>a</sup>, Ran Ran <sup>a</sup>, Wei Zhou <sup>a</sup>, Kaiming Liao <sup>a,\*</sup> and Zongping Shao <sup>a,b</sup>

<sup>a</sup> State Key Laboratory of Materials-Oriented Chemical Engineering, College of Chemical Engineering, Nanjing Tech University, Nanjing 210009, China

<sup>b</sup> WA School of Mines: Minerals, Energy and Chemical Engineering (WASM-MECE), Curtin University, Perth, WA 6845, Australia

Q.L. and X.Z. contributed equally to this work.

\* Corresponding author, E-mail: [kaimingliao@njtech.edu.cn](mailto:kaimingliao@njtech.edu.cn)

## Supplementary Figures and Tables

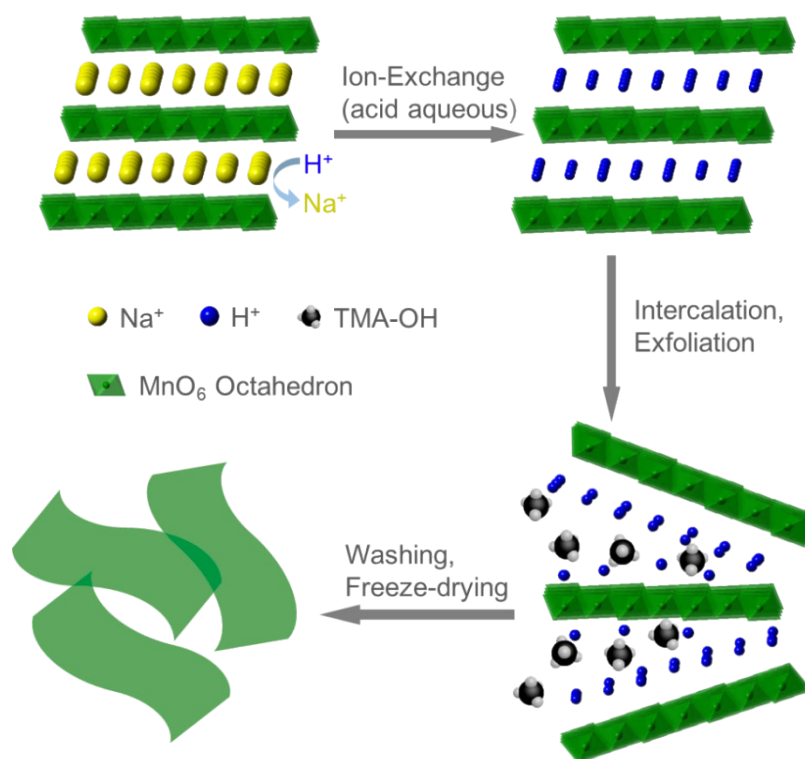

**Figure S1.** Schematic illustration of synthetic procedures of the  $H_xMnO_{2+x}$  nanosheets.

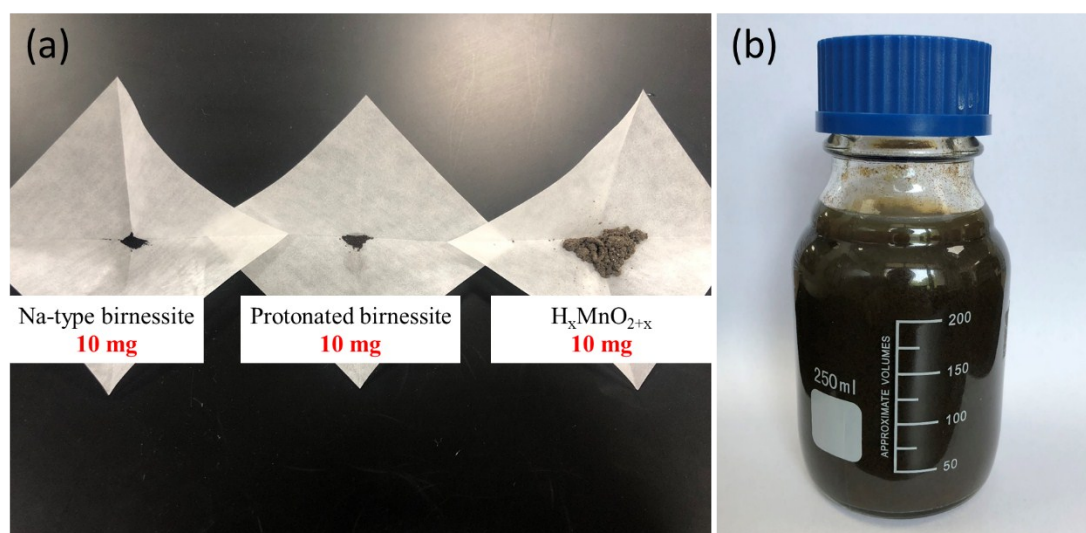

**Figure S2.** Photographs of (a) Na-type birnessite, protonated birnessite, and delaminated  $H_xMnO_{2+x}$  powder with the same mass; (b) delaminated  $H_xMnO_{2+x}$  suspension in TMAOH solution.

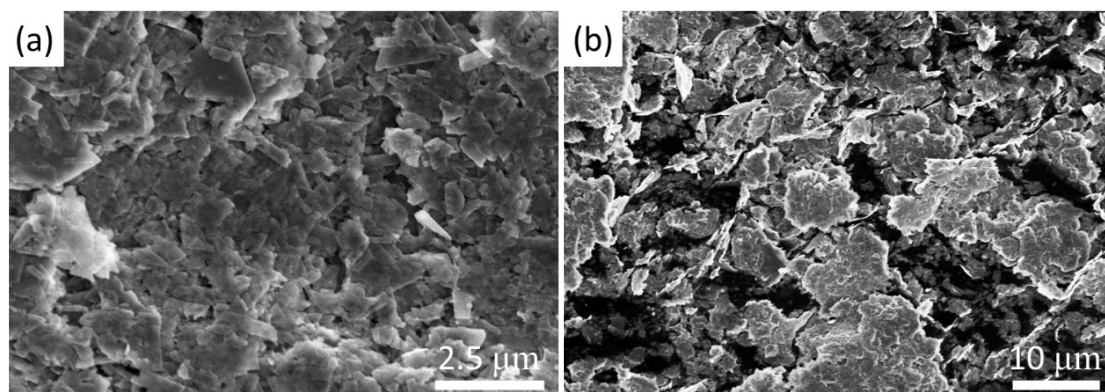

**Figure S3.** SEM images of Na-type birnessite.

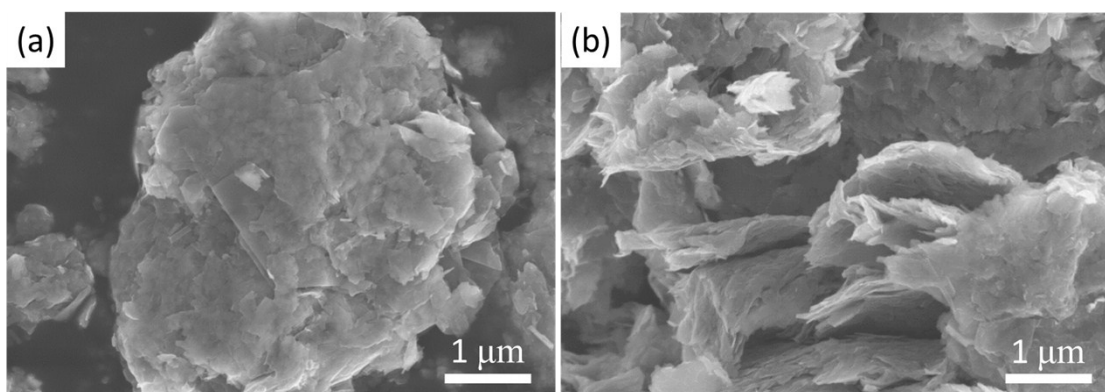

**Figure S4.** SEM images of protonic birnessite.

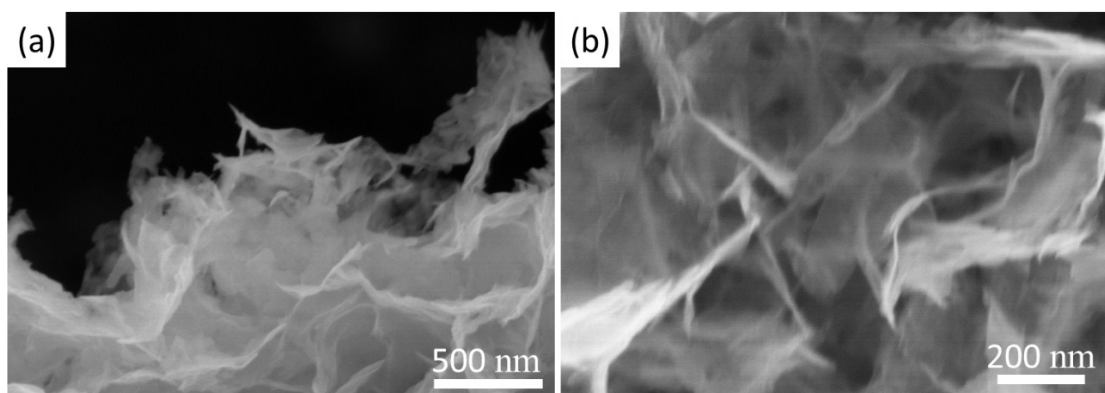

**Figure S5.** SEM images of delaminated  $H_xMnO_{2+x}$  nanosheets.

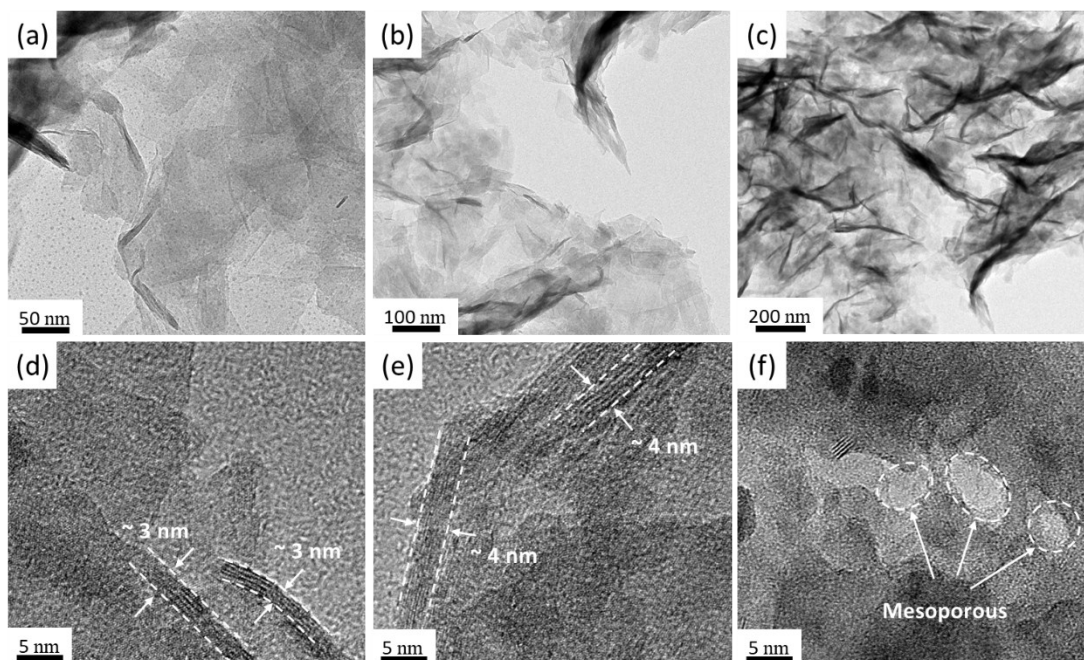

**Figure S6.** (a, b, c) TEM image and (d, e, f) HRTEM image of delaminated  $H_xMnO_{2+x}$  nanosheets.

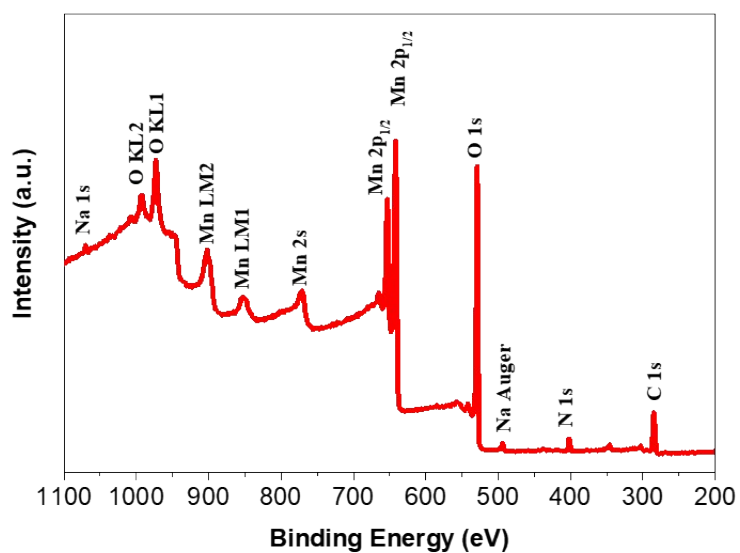

**Figure S7.** XPS survey of delaminated  $H_xMnO_{2+x}$  nanosheets.

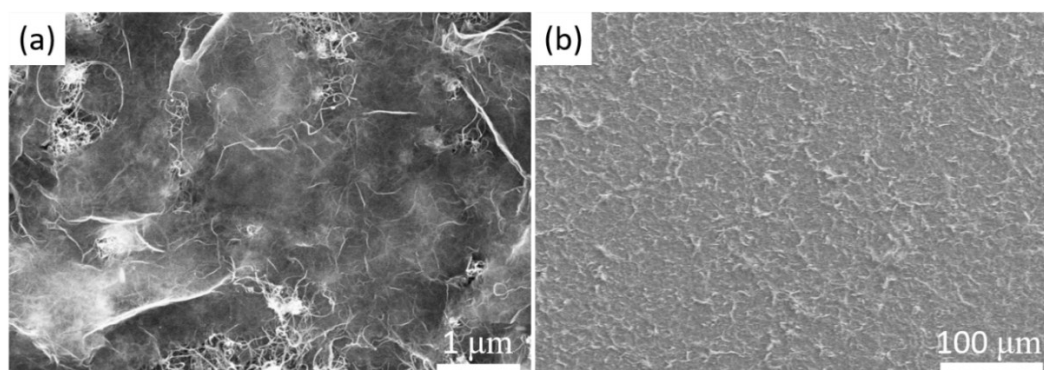

**Figure S8.** SEM images of G-PP separator from top view.

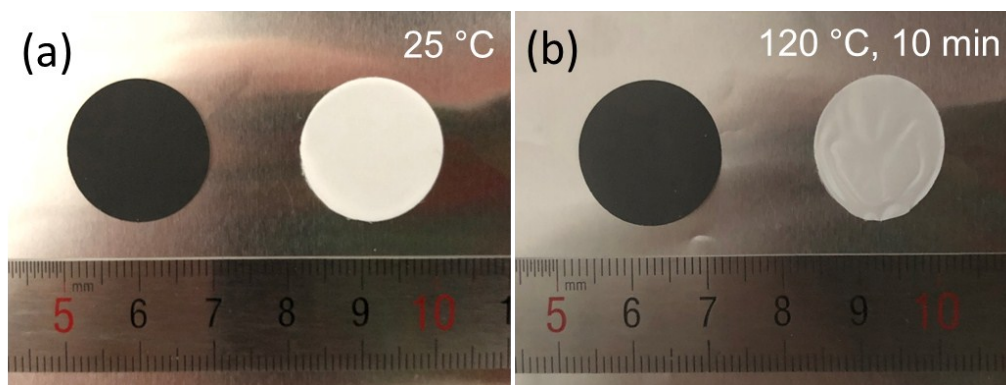

**Figure S9.** Digital photographs of the EB-PP (left) and PP (right) separator at heating temperature (a) 25 °C and (b) 120 °C.

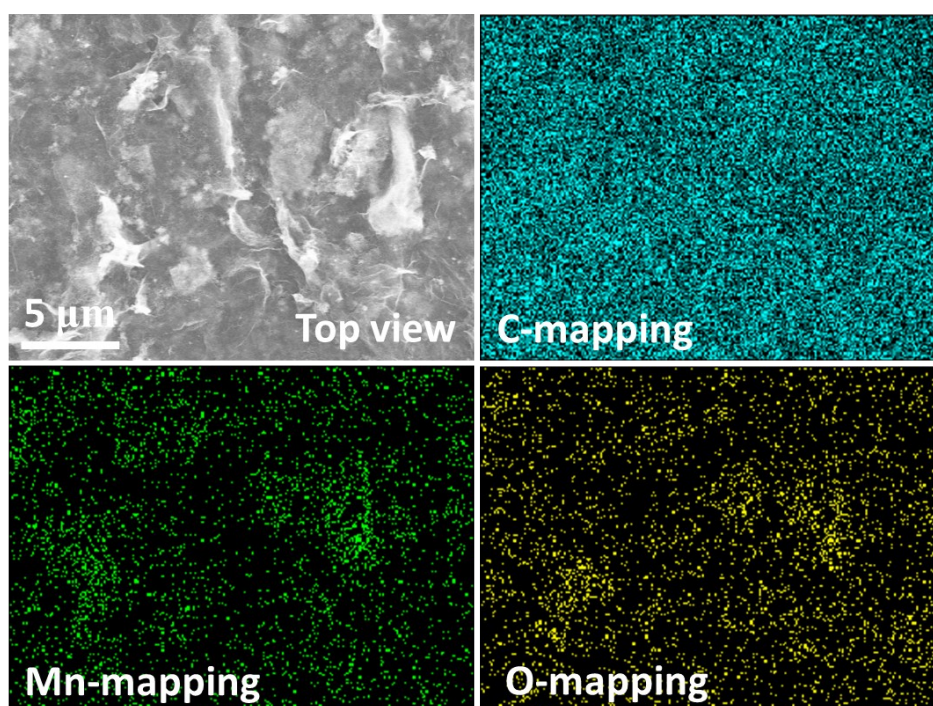

**Figure S10.** SEM images of EB-PP separator from top view and corresponding EDX mapping of C, Mn and O elements.

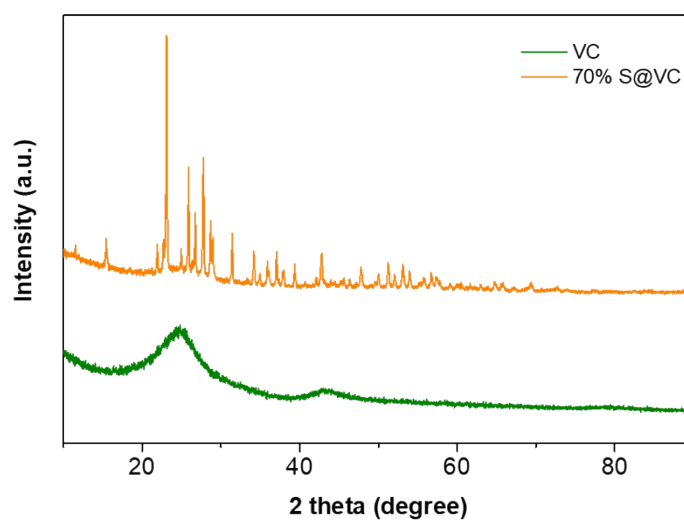

**Figure S11.** X-ray diffraction (XRD) patterns of Vulcan XC-72 and 70%S@VC.

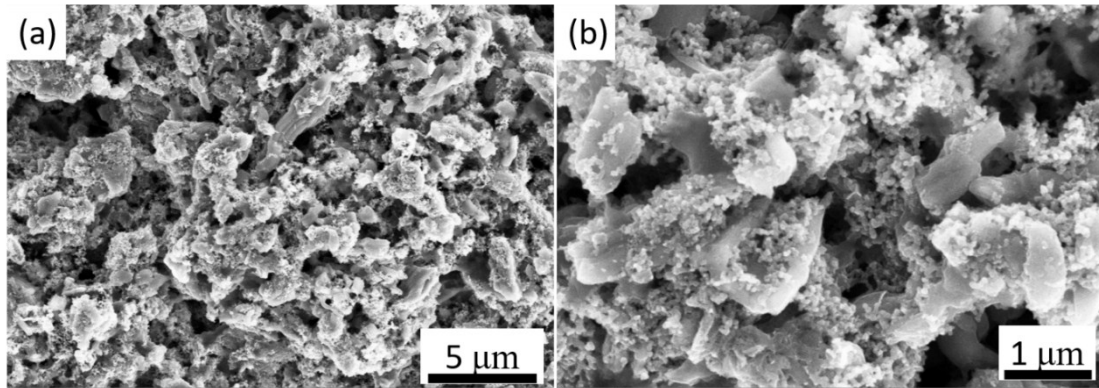

**Figure S12.** Surface SEM images of 70%S@VC cathode.

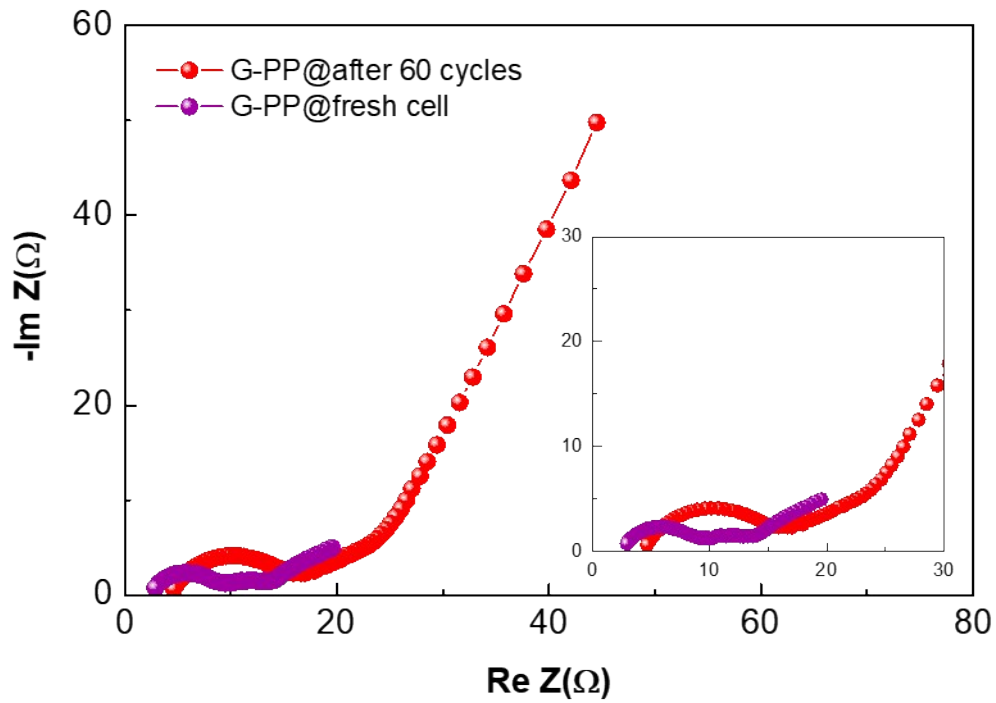

**Figure S13.** Electrochemical impedance spectra with G-PP separator collected before and after cycling, respectively

**Table S1.** The parameters gained from the EIS curves in Figure 4a.

| Samples | First cycle<br>$R_e$ ( $\Omega$ ) | After 60 <sup>th</sup><br>$R_e$ ( $\Omega$ ) | First cycle<br>$R_{ct}$ ( $\Omega$ ) | After 60 <sup>th</sup><br>$R_{ct}$ ( $\Omega$ ) | First cycle<br>$R_f$ ( $\Omega$ ) | After 60 <sup>th</sup><br>$R_f$ ( $\Omega$ ) |
|---------|-----------------------------------|----------------------------------------------|--------------------------------------|-------------------------------------------------|-----------------------------------|----------------------------------------------|
| PP      | 1.67                              | 2.35                                         | 17.61                                | 24.45                                           | 16.41                             | 15.69                                        |
| G-PP    | 2.56                              | 4.33                                         | 5.50                                 | 10.41                                           | 6.34                              | 13.69                                        |
| EB-PP   | 1.55                              | 2.16                                         | 18.17                                | 15.61                                           | \                                 | \                                            |

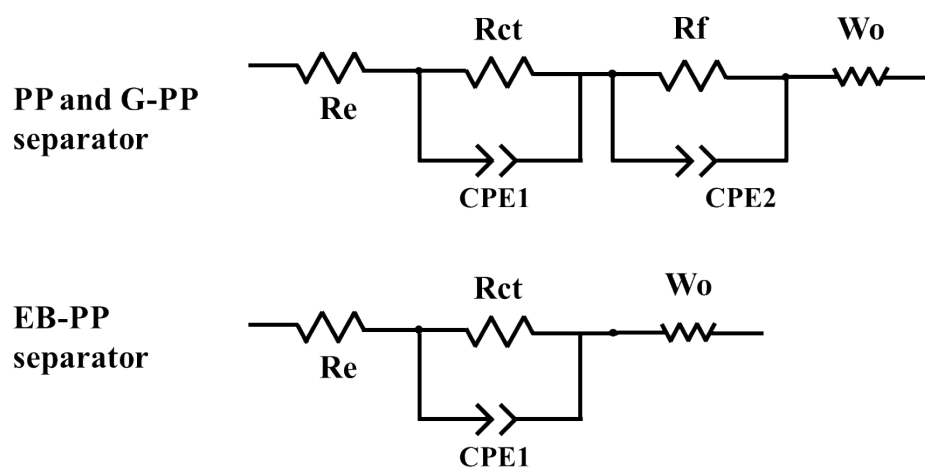

**Figure S14.** The equivalent circuit for PP, G-PP and EB-PP separator.

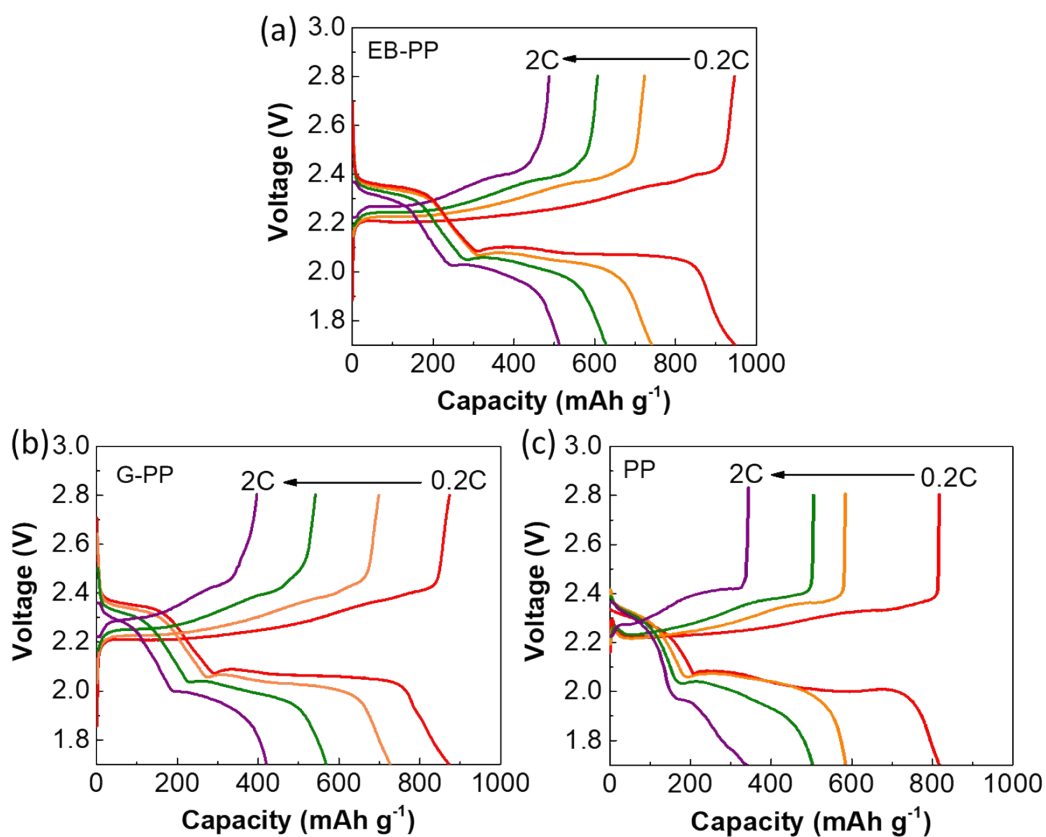

**Figure S15.** Charge-discharge curves of (a) EB-PP, (b) G-PP and (c) PP separators at various current densities from 0.2 to 2 C.

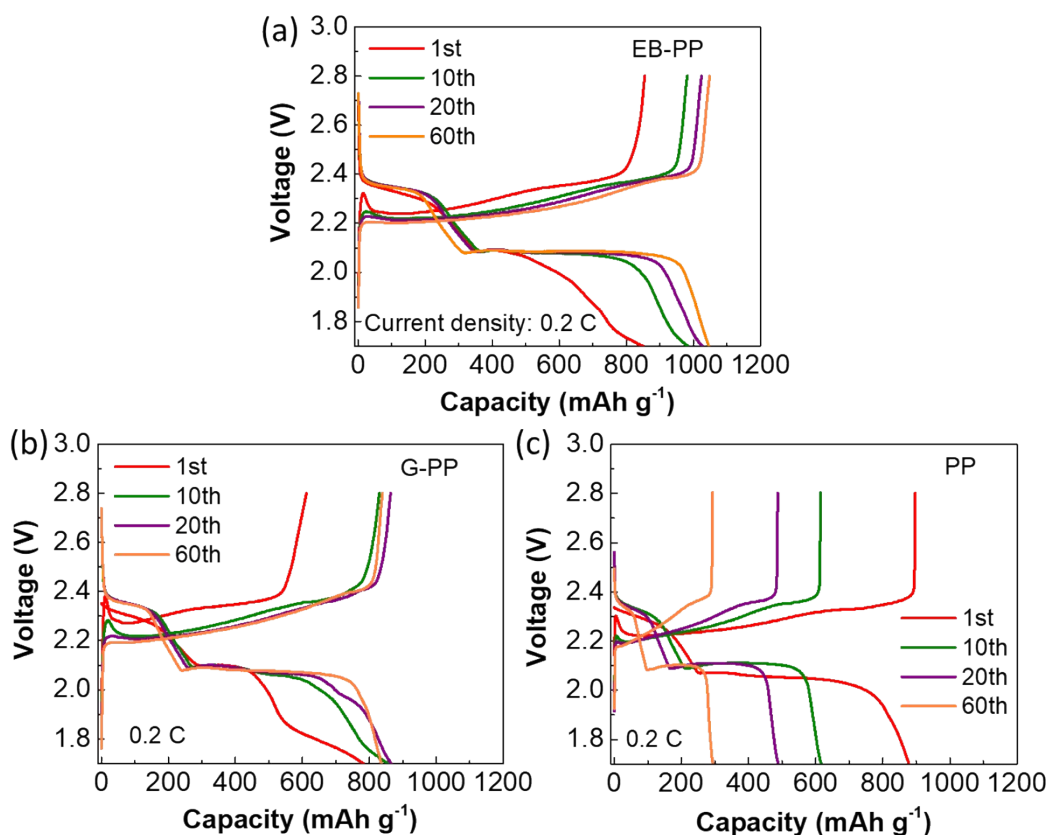

**Figure S16.** Charge-discharge curves of (a) EB-PP, (b) G-PP and (c) PP separators at various cycles at 0.2 C.



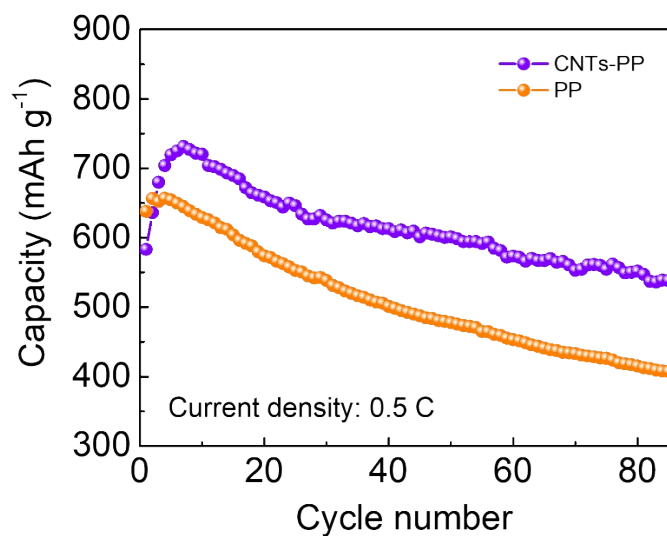

**Figure S17.** Cycling performance of Li-S battery with CNTs-PP and PP separator with sulfur mass load of  $1.8 \text{ mg cm}^{-2}$  at current density of  $0.5 \text{ C}$ .

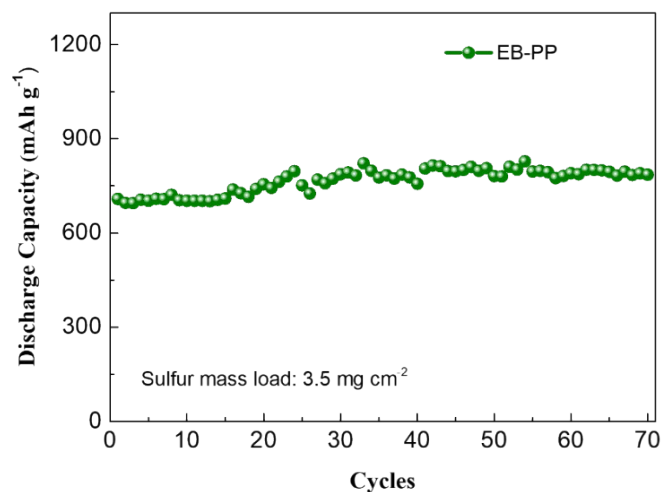

**Figure S18.** Cycling performance of Li-S battery with the EB-PP separator with sulfur mass load of  $3.5 \text{ mg cm}^{-2}$  at current density of  $0.1 \text{ C}$ .

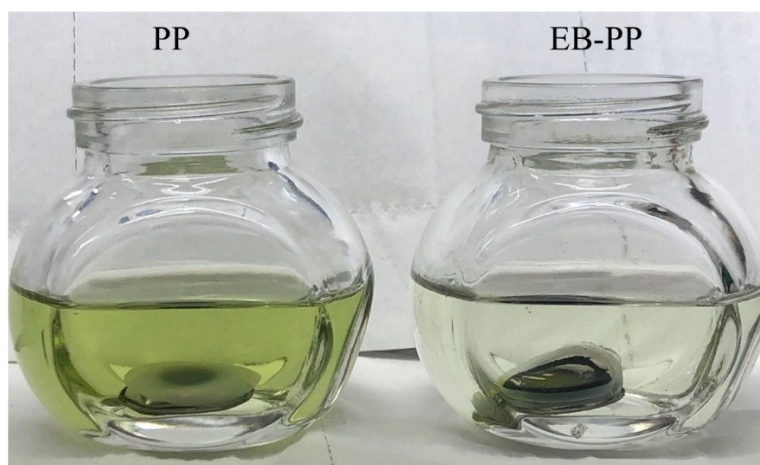

**Figure S19.** Immersing of the cycled electrode and separator harvested from the batteries with PP and EB-PP in DME solvent for 1 h.

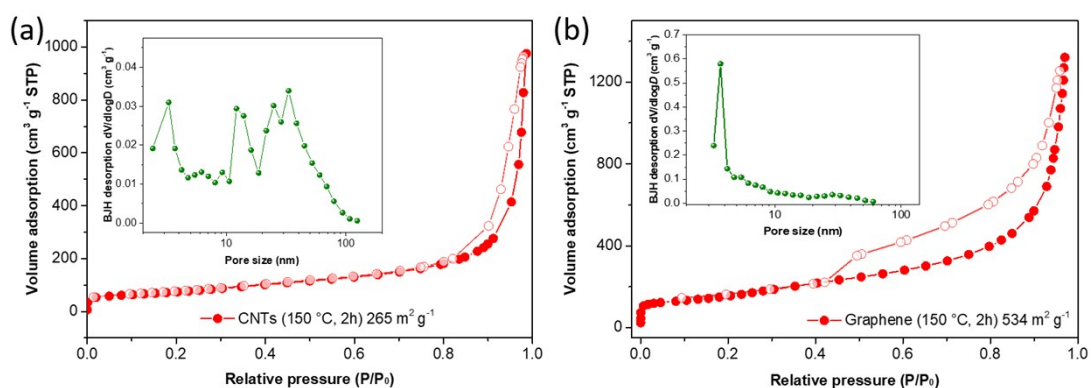

**Figure S20.** Adsorption/desorption isotherms and corresponding pore size distribution of (a) CNTs and (b) graphene.

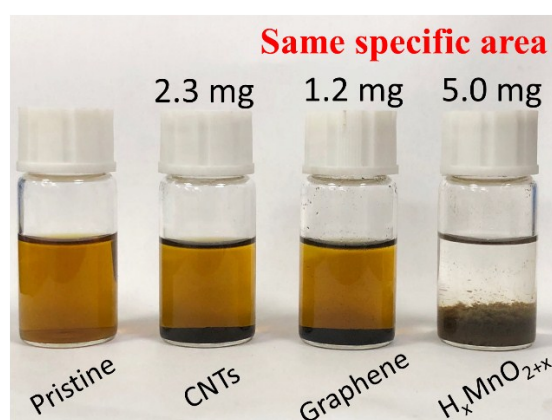

**Figure S21.** Sealed vials of the  $\text{Li}_2\text{S}_6$  solution after contact with same specific area of different sample powders.

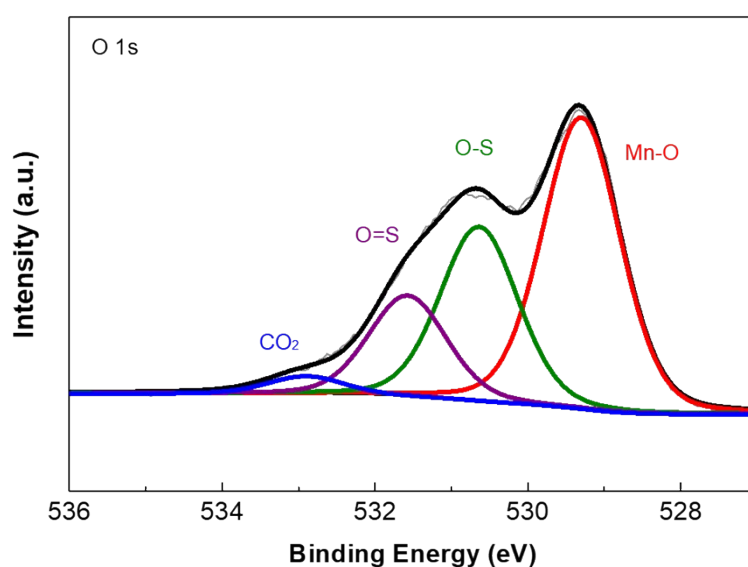

**Figure S22.** O 1s XPS spectra of  $\text{H}_x\text{MnO}_{2+x}@\text{Li}_2\text{S}_6$ .

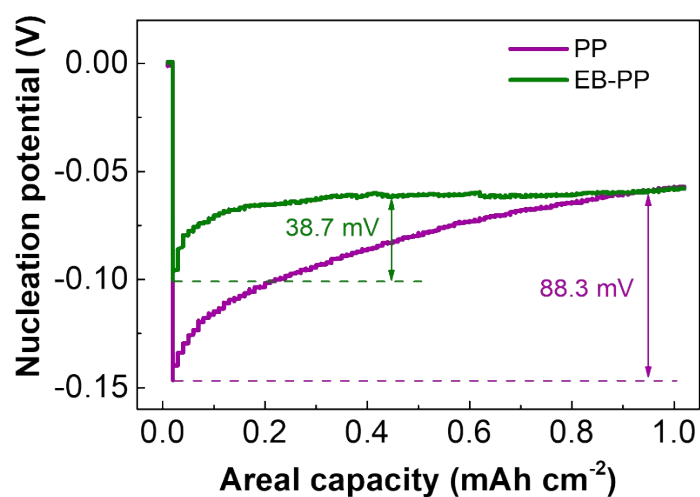

**Figure S23.** Nucleation overpotential of the Li symmetrical cells with PP separator (purple line) and EB-PP separator (green line).

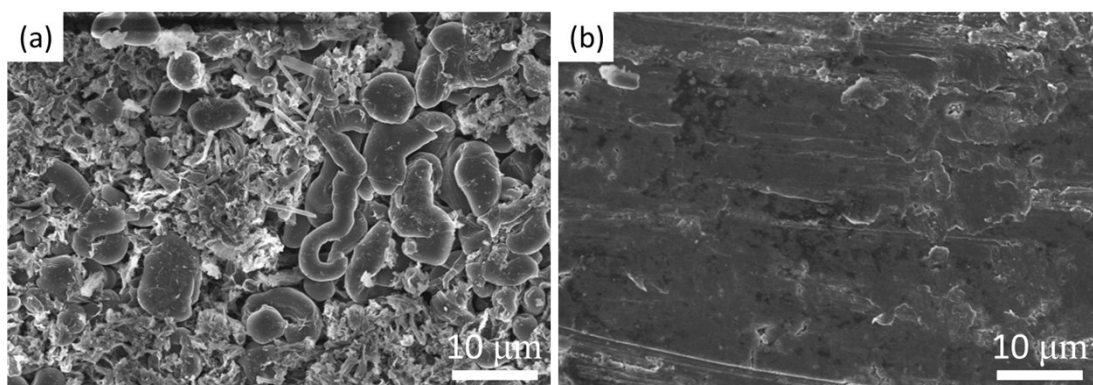

**Figure S24.** Surface SEM images of lithium anode with (e) PP separator, and (f) EB-PP separator after cycling.

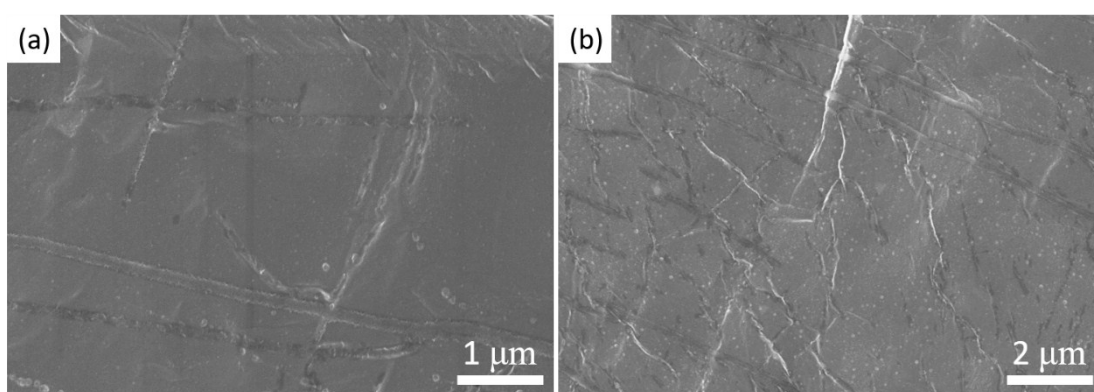

**Figure S25.** SEM images of fresh lithium metal.

**Table S2.** The performance of the Li-S batteries with various modified separators.

| Barrier                                                                                      | Weight of barrier (mg cm <sup>-2</sup> ) | Thickness of barrier (μm) | S loading (mg cm <sup>-2</sup> ) | S content (wt%) <sup>a</sup> | S content (wt%) <sup>b</sup> | Current density (A g <sup>-1</sup> ) <sup>c</sup> | Capacity decay Cycles | Ref   |
|----------------------------------------------------------------------------------------------|------------------------------------------|---------------------------|----------------------------------|------------------------------|------------------------------|---------------------------------------------------|-----------------------|-------|
| Graphene                                                                                     | 1.3                                      | 30                        | 1.5-2.1                          | 70                           | 38~43                        | 1.5                                               | 0.064%<br>500 cycles  | [S1]  |
| Graphene oxide (GO)                                                                          | 0.29                                     | 0.75                      | 1-1.2                            | 60                           | 47-48                        | 1.67                                              | ~0.150%<br>400 cycles | [S2]  |
| Mesoporous carbon                                                                            | 0.5                                      | 27                        | 1.55                             | 49                           | 37                           | 0.74                                              | 0.081%<br>500 cycles  | [S3]  |
| Li <sub>4</sub> Ti <sub>5</sub> O <sub>12</sub> /graphene                                    | 0.35                                     | 35                        | 1.2                              | 60                           | 47                           | 0.5                                               | 0.066%<br>300 cycles  | [S4]  |
| LDH/graphene                                                                                 | 0.3                                      | 2                         | 1.1-1.3                          | 63                           | 50-51                        | 3.2                                               | 0.060%<br>1000 cycles | [S5]  |
| Ti <sub>3</sub> C <sub>2</sub>                                                               | 0.4                                      | 2                         | 0.7-1                            | 48                           | 31-34                        | 0.84                                              | 0.262%<br>200 cycles  | [S6]  |
| SnO <sub>2</sub> /rGO                                                                        | 0.15                                     | 20                        | 2.87                             | 55                           | 52                           | 1.67                                              | ~0.133%<br>200 cycles | [S7]  |
| Fe <sub>3</sub> O <sub>4</sub> @Graphene                                                     | 0.478                                    | 30                        | 0.6-0.9                          | 60                           | 33-39                        | 1.67                                              | 0.024%<br>500 cycles  | [S8]  |
| MoO <sub>3</sub> @CNT                                                                        | 0.577                                    | 30                        | 1                                | 60                           | 38                           | 0.5                                               | 0.190%<br>200 cycles  | [S9]  |
| Li <sub>6</sub> La <sub>3</sub> Ta <sub>1.5</sub> Y <sub>0.5</sub> O <sub>12</sub> /Graphene | 0.8                                      | ~11                       | 1.8                              | 60                           | 42                           | 0.84                                              | 0.095%<br>200 cycles  | [S10] |
| TiO <sub>2</sub> @carbon nanofibers                                                          | 1.6                                      | 30                        | 3                                | 49                           | 32                           | 0.34                                              | 0.126%<br>300 cycles  | [S11] |
| CNT@TiO <sub>2</sub>                                                                         | 0.7                                      | 12                        | 1.7                              | 60                           | 43                           | 1.67                                              | 0.056%<br>1000 cycles | [S12] |
| B-rGO                                                                                        | 0.2-0.3                                  | 25                        | 1.45-1.56                        | 56                           | 46-50                        | 0.167                                             | 0.1532%<br>300 cycles | [S13] |
| This work <sup>d</sup>                                                                       | 0.2                                      | 3                         | 1.8                              | 56                           | 51                           | 1.67                                              | 0.040%<br>1000 cycles | /     |

(a) the S contents of the sulfur composite cathodes, (b) the S contents of the sulfur composite cathodes after decorated with the barrier modified separator, (c) 1.67 A g<sup>-1</sup> = 1 C, (d) EB-PP.

## Reference

- [S1] G. Zhou, L. Li, D. Wang, X. Shan, S. Pei, F. Li and H. Cheng, *Adv. Mater.*, 2015, **27**, 641-647.
- [S2] M. Shaibani, A. Akbari, P. Sheath, C. Easton, P. Banerjee, K. Konostas, A. Fakhfour, M. Barghamadi, M. Musameh, A. Best, T. Ruther, P. Mahon, M. Hill, A. Hollenkamp and M. Majumder, *ACS Nano*, 2016, **10**, 7768-7779.
- [S3] J. Balach, T. Jaumann, M. Klose, S. Oswald, J. Eckert and G. Lars, *Adv. Funct. Mater.*, 2015, **25**, 5285–5291.
- [S4] Y. Zhao, M. Liu, W. Lv, Y.-B. He, C. Wang, Q. Yun, B. Li, F. Kang and Q.-H. Yang, *Nano Energy*, 2016, **30**, 1-8.
- [S5] H. Peng, Z. Zhang, J. Huang, G. Zhang, J. Xie, W. Xu, J. Shi, X. Chen, X. Cheng and Q. Zhang, *Adv. Mater.*, 2016, **28**, 9551-9558.
- [S6] Y. Dong, S. Zheng, J. Qin, X. Zhao, H. Shi, X. Wang, J. Chen and Z. Wu, *ACS Nano*, 2018, **12**, 2381-2388.
- [S7] N. Hu, X. Lv, Y. Dai, L. Fan, D. Xiong and X. Li, *ACS Appl. Mater. Interfaces*, 2018, **10**, 18665-18674.
- [S8] Y. Liu, X. Qin, S. Zhang, G. Liang, F. Kang, G. Chen and B. Li, *ACS Appl. Mater. Interfaces*, 2018, **10**, 26264-26273.
- [S9] L. Luo, X. Qin, J. Wu, G. Liang, Q. Li, M. Liu, F. Kang, G. Chen and B. Li, *J. Mater. Chem. A*, 2018, **6**, 8612–8619.
- [S10] P. Kim, S. Narayanan, J. Xue, V. Thangadurai and V. Pol, *ACS Appl. Energy Mater.*, 2018, **1**, 3733–3741.
- [S11] T. Zhao, Y. Ye, C. Lao, G. Divitini, P. Coxon, X. Peng, X. He, H. Kim, K. Xi, C. Ducati, R. Chen, Y. Liu, S. Ramakrishna and R.V. Kumar, *Small*, 2017, **13**, 1700357.
- [S12] L. Yang, G. Li, X. Jiang, T. Zhang, H. Lin and J. Lee, *J. Mater. Chem. A*, 2017, **5**, 12506–12512.
- [S13] F. Wu, J. Qian, R. Chen, Y. Ye, Z. Sun, Y. Xing and L. Li, *J. Mater. Chem. A*, 2016, **4**, 17033–17041.
